# Supplementary material for: Associations between Household Solid Fuel Use, Obesity, and Cardiometabolic Health in China: A Cohort Study from 2011 to 2018
Source: MDPI journal article supplement (doi:10.3390/ijerph20042826), 2023-02-05
Supplement: s1 [file s1]

Table S1. HRs (95% CIs) for incident CMD by household solid fuel exposure as stratified by abdominal adiposity.

| <b>Cardiometabolic Disease (CMD)</b> |                                     |                             |                    |                                         |                             |                    |
|--------------------------------------|-------------------------------------|-----------------------------|--------------------|-----------------------------------------|-----------------------------|--------------------|
|                                      | <b>Abdominal adiposity (n=2814)</b> |                             |                    | <b>Non-abdominal adiposity (n=3224)</b> |                             |                    |
|                                      | <b>Cases</b>                        | <b>Cases/PYs (1/10,000)</b> | <b>HRs (95%CI)</b> | <b>Cases</b>                            | <b>Cases/PYs (1/10,000)</b> | <b>HRs (95%CI)</b> |
| <b>Cooking</b>                       |                                     |                             |                    |                                         |                             |                    |
| Household fuel                       |                                     |                             |                    |                                         |                             |                    |
| Clean fuel                           | 198                                 | 691.58                      | 1.00               | 117                                     | 585.58                      | 1.00               |
| Solid fuel                           | 372                                 | 1299.34                     | 1.26 (1.06, 1.50)  | 280                                     | 1401.40                     | 1.29 (1.03, 1.62)  |
| Duration of solid fuel use           |                                     |                             | 1.05 (1.01, 1.08)  |                                         |                             | 1.09 (1.05, 1.13)  |
| Types of household fuel use          |                                     |                             |                    |                                         |                             |                    |
| Clean fuel                           | 198                                 | 691.58                      | 1.00               | 117                                     | 585.59                      | 1.00               |
| Coal                                 | 93                                  | 324.83                      | 1.35 (1.06, 1.72)  | 45                                      | 225.23                      | 1.32 (0.94, 1.87)  |
| Crop residue/wood                    | 279                                 | 974.50                      | 1.23 (1.02, 1.48)  | 235                                     | 1176.18                     | 1.28 (1.02, 1.62)  |
| <b>Heating</b>                       |                                     |                             |                    |                                         |                             |                    |
| Household fuel                       |                                     |                             |                    |                                         |                             |                    |
| Clean fuel                           | 188                                 | 656.65                      | 1.00               | 132                                     | 660.66                      | 1.00               |
| Solid fuel                           | 382                                 | 1334.26                     | 1.34 (1.13, 1.59)  | 265                                     | 1326.33                     | 1.20 (0.97, 1.48)  |
| Duration of solid fuel use           |                                     |                             | 1.12 (1.07, 1.18)  |                                         |                             | 1.13 (1.06, 1.20)  |
| Types of household fuel use          |                                     |                             |                    |                                         |                             |                    |
| Clean fuel                           | 188                                 | 656.65                      | 1.00               | 132                                     | 660.66                      | 1.00               |
| Coal                                 | 223                                 | 778.90                      | 1.45 (1.20, 1.75)  | 122                                     | 610.61                      | 1.31 (1.03, 1.67)  |
| Crop residue/wood                    | 159                                 | 555.36                      | 1.20 (0.97, 1.48)  | 143                                     | 715.72                      | 1.11 (0.87, 1.41)  |

Note: CMD, cardiometabolic disease; HR, hazard ratio; CI, confidence interval; PYs, person-years. CMD include heart disease, stroke, and T2D. Multivariable models were adjusted for age, gender, marital status, education level, residence, smoking and alcohol consumption. *P* values<0.05 are bold.

Table S2. HRs (95% CIs) for incident CMM by household solid fuel exposure as stratified by abdominal adiposity.

|                             | CMM                          |                      |                   |                                  |                      |                   |
|-----------------------------|------------------------------|----------------------|-------------------|----------------------------------|----------------------|-------------------|
|                             | Abdominal adiposity (n=2814) |                      |                   | Non-abdominal adiposity (n=3224) |                      |                   |
|                             | Cases                        | Cases/PYs (1/10,000) | HRs (95%CI)       | Cases                            | Cases/PYs (1/10,000) | HRs (95%CI)       |
| Cooking                     |                              |                      |                   |                                  |                      |                   |
| Household fuel              |                              |                      |                   |                                  |                      |                   |
| Clean fuel                  | 28                           | 597.01               | 1.00              | 10                               | 526.32               | 1.00              |
| Solid fuel                  | 53                           | 1130.06              | 1.20 (0.76, 1.89) | 24                               | 1263.16              | 1.14 (0.54, 2.38) |
| Duration of solid fuel use  |                              |                      | 1.08 (1.00, 1.18) |                                  |                      | 1.09 (0.98, 1.22) |
| Types of household fuel use |                              |                      |                   |                                  |                      |                   |
| Clean fuel                  | 28                           | 597.01               | 1.00              | 10                               | 526.32               | 1.00              |
| Coal                        | 13                           | 277.19               | 1.31 (0.68, 2.50) | 3                                | 157.89               | 0.95 (0.26, 3.49) |
| Crop residue/wood           | 40                           | 852.88               | 1.16 (0.71, 1.88) | 21                               | 1105.26              | 1.18 (0.55, 2.50) |
| Heating                     |                              |                      |                   |                                  |                      |                   |
| Household fuel              |                              |                      |                   |                                  |                      |                   |
| Clean fuel                  | 24                           | 511.73               | 1.00              | 10                               | 526.32               | 1.00              |
| Solid fuel                  | 57                           | 1215.35              | 1.49 (0.92, 2.40) | 24                               | 1263.16              | 1.31 (0.64, 2.69) |
| Duration of solid fuel use  |                              |                      | 1.19 (1.05, 1.36) |                                  |                      | 1.23 (1.02, 1.49) |
| Types of household fuel use |                              |                      |                   |                                  |                      |                   |
| Clean fuel                  | 24                           | 511.73               | 1.00              | 10                               | 526.32               | 1.00              |
| Coal                        | 33                           | 703.62               | 1.62 (0.96, 2.76) | 7                                | 368.42               | 0.94 (0.35, 2.48) |
| Crop residue/wood           | 24                           | 511.73               | 1.32 (0.75, 2.33) | 17                               | 894.74               | 1.59 (0.74, 3.41) |

Note: CMM, cardiometabolic multimorbidity; HR, hazard ratio; CI, confidence interval; PYs, person-years. CMD include heart disease, stroke, and T2D. CMM is defined as occurring at least two of the above-mentioned diseases. Multivariable models were adjusted for age, gender, marital status, education level, residence, smoking and alcohol consumption. *P* values<0.05 are bold.

Table S3. Interactions between household solid fuel exposure and abdominal adiposity on the incident of CMD and CMM.

|                      |                     | CMD   |                      |                   | CMM   |                      |                   |
|----------------------|---------------------|-------|----------------------|-------------------|-------|----------------------|-------------------|
| Variable             | Variable            | Cases | Cases/PYs (1/10,000) | HRs (95%CI)       | Cases | Cases/PYs (1/10,000) | HRs (95%CI)       |
| Cooking (solid fuel) | Abdominal adiposity |       |                      |                   |       |                      |                   |
| -                    | -                   | 117   | 240.69               | 1.00              | 10    | 151.75               | 1.00              |
| -                    | +                   | 198   | 407.32               | 1.65 (1.31, 2.08) | 28    | 424.89               | 2.64 (1.27, 5.46) |
| +                    | -                   | 280   | 576.01               | 1.25 (1.01, 1.56) | 24    | 364.19               | 1.18 (0.56, 2.48) |
| +                    | +                   | 372   | 765.27               | 2.10 (1.70, 2.60) | 53    | 804.25               | 3.10 (1.56, 6.17) |
| Heating (solid fuel) | Abdominal adiposity |       |                      |                   |       |                      |                   |
| -                    | -                   | 132   | 271.55               | 1.00              | 10    | 151.75               | 1.00              |
| -                    | +                   | 188   | 386.75               | 1.52 (1.21, 1.90) | 24    | 364.19               | 2.48 (1.20, 5.15) |
| +                    | -                   | 265   | 545.16               | 1.18 (0.96, 1.45) | 24    | 364.19               | 1.36 (0.65, 2.83) |
| +                    | +                   | 382   | 785.85               | 2.04 (1.67, 2.50) | 57    | 864.95               | 3.64 (1.87, 7.10) |

Note: CMD, cardiometabolic disease; CMM, cardiometabolic multimorbidity; HR, hazard ratio; CI, confidence interval; PYs, person-years. CMD include heart disease, stroke, and T2D. CMM is defined as occurring at least two of the above-mentioned diseases. Multivariable models were adjusted for age, gender, marital status, education level, residence, smoking and alcohol consumption. *P* values<0.05 are bold.

Table S4. HRs (95% CIs) for incident CMD, CMM by household fuel exposure.

|                                  | CMD   |                      |                   | CMM   |                      |                   |
|----------------------------------|-------|----------------------|-------------------|-------|----------------------|-------------------|
|                                  | Cases | Cases/PYs (1/10,000) | HRs (95%CI)       | Cases | Cases/PYs (1/10,000) | HRs (95%CI)       |
| Both clean fuel                  | 178   | 366.18               | 1.00              | 16    | 242.79               | 1.00              |
| Cook clean while heat solid fuel | 137   | 281.84               | 1.30 (1.04, 1.62) | 22    | 333.84               | 2.20 (1.17, 4.13) |
| Cook solid while heat clean fuel | 142   | 292.12               | 1.25 (1.00, 1.57) | 18    | 273.14               | 1.66 (0.86, 3.23) |
| Both solid fuel                  | 510   | 1049.17              | 1.44 (1.21, 1.71) | 59    | 895.30               | 1.71 (1.00, 2.93) |

Note: CMD, cardiometabolic disease; CMM, cardiometabolic multimorbidity; HR, hazard ratio; CI, confidence interval; PYs, person-years. CMD include heart disease, stroke, and T2D. CMM is defined as occurring at least two of the above-mentioned diseases. Multivariable models were adjusted for age, gender, marital status, education level, residence, smoking and alcohol consumption. *P* values<0.05 are bold.

Table S5. HRs (95% CIs) for incident CMD, CMM by switching fuel types.

|                       | N (%)        | CMD   |                         |                   | CMM   |                         |                   |
|-----------------------|--------------|-------|-------------------------|-------------------|-------|-------------------------|-------------------|
|                       |              | Cases | Cases/PYs<br>(1/10,000) | HRs (95%CI)       | Cases | Cases/PYs<br>(1/10,000) | HRs (95%CI)       |
| Cooking               |              |       |                         |                   |       |                         |                   |
| Persistent solid fuel | 1881 (31.15) | 367   | 754.99                  | 1.00              | 47    | 713.20                  | 1.00              |
| Solid to clean fuel   | 1510 (25.01) | 285   | 586.30                  | 0.95 (0.82, 1.12) | 30    | 455.24                  | 0.78 (0.49, 1.23) |
| Clean to solid fuel   | 244 (4.04)   | 38    | 78.17                   | 0.76 (0.54, 1.06) | 4     | 60.70                   | 0.64 (0.23, 1.79) |
| Persistent clean fuel | 1735 (28.73) | 277   | 569.84                  | 0.80 (0.68, 0.94) | 34    | 515.93                  | 0.82 (0.52, 1.31) |
| Heating               |              |       |                         |                   |       |                         |                   |
| Persistent solid fuel | 190 (3.15)   | 55    | 113.15                  | 1.00              | 9     | 136.57                  | 1.00              |
| Solid to clean fuel   | 3130 (51.84) | 592   | 1217.86                 | 0.60 (0.46, 0.79) | 72    | 1092.56                 | 0.47 (0.23, 0.95) |
| Clean to solid fuel   | 6 (0.10)     | 1     | -                       | -                 | 0     | -                       | -                 |
| Persistent clean fuel | 2044 (33.85) | 319   | 656.24                  | 0.48 (0.36, 0.64) | 34    | 515.93                  | 0.35 (0.17, 0.72) |

Note: CMD, cardiometabolic disease; CMM, cardiometabolic multimorbidity; HR, hazard ratio; CI, confidence interval; PYs, person-years. CMD include heart disease, stroke, and T2D. CMM is defined as occurring at least two of the above-mentioned diseases. Multivariable models were adjusted for age, gender, marital status, education level, residence, smoking and alcohol consumption. *P* values<0.05 are bold.

Table S6. HRs (95% CIs) for incident heart disease, stroke, T2D by household solid fuel exposure.

|                             | Heart Disease |                         |                   | Stroke |                         |                   | T2D   |                         |                   |
|-----------------------------|---------------|-------------------------|-------------------|--------|-------------------------|-------------------|-------|-------------------------|-------------------|
|                             | Cases         | Cases/PYs<br>(1/10,000) | HRs (95%CI)       | Cases  | Cases/PYs<br>(1/10,000) | HRs (95%CI)       | Cases | Cases/PYs<br>(1/10,000) | HRs (95%CI)       |
| Cooking                     |               |                         |                   |        |                         |                   |       |                         |                   |
| Household fuel              |               |                         |                   |        |                         |                   |       |                         |                   |
| Clean fuel                  | 155           | 648.54                  | 1.00              | 91     | 615.28                  | 1.00              | 112   | 658.05                  | 1.00              |
| Solid fuel                  | 317           | 1326.36                 | 1.20 (0.98, 1.46) | 204    | 1379.31                 | 1.28 (0.99, 1.65) | 212   | 1245.59                 | 1.20 (0.94, 1.52) |
| Duration of solid fuel use  |               |                         | 1.07 (1.03, 1.10) |        |                         | 1.07 (1.03, 1.12) |       |                         | 1.03 (0.99, 1.07) |
| Types of household fuel use |               |                         |                   |        |                         |                   |       |                         |                   |
| Clean fuel                  | 155           | 648.54                  | 1.00              | 91     | 615.28                  | 1.00              | 112   | 658.05                  | 1.00              |
| Coal                        | 70            | 292.89                  | 1.38 (1.04, 1.83) | 44     | 297.50                  | 1.47 (1.03, 2.11) | 41    | 240.89                  | 1.15 (0.81, 1.64) |
| Crop residue/wood           | 247           | 1033.47                 | 1.15 (0.93, 1.41) | 160    | 1081.81                 | 1.22 (0.94, 1.60) | 171   | 1004.70                 | 1.21 (0.94, 1.56) |
| Heating                     |               |                         |                   |        |                         |                   |       |                         |                   |
| Household fuel              |               |                         |                   |        |                         |                   |       |                         |                   |
| Clean fuel                  | 139           | 581.59                  | 1.00              | 94     | 635.56                  | 1.00              | 123   | 722.68                  | 1.00              |
| Solid fuel                  | 333           | 1393.31                 | 1.50 (1.23, 1.82) | 201    | 1359.03                 | 1.29 (1.00, 1.65) | 201   | 1180.96                 | 1.03 (0.82, 1.29) |
| Duration of solid fuel use  |               |                         | 1.18 (1.12, 1.25) |        |                         | 1.14 (1.07, 1.22) |       |                         | 1.05 (0.98, 1.13) |
| Types of household fuel use |               |                         |                   |        |                         |                   |       |                         |                   |
| Clean fuel                  | 139           | 581.59                  | 1.00              | 94     | 635.56                  | 1.00              | 123   | 722.68                  | 1.00              |
| Coal                        | 180           | 753.14                  | 1.70 (1.36, 2.11) | 113    | 764.03                  | 1.55 (1.18, 2.04) | 97    | 569.92                  | 1.02 (0.78, 1.33) |
| Crop residue/wood           | 153           | 640.17                  | 1.30 (1.03, 1.64) | 88     | 595.00                  | 1.04 (0.78, 1.40) | 104   | 611.05                  | 1.05 (0.80, 1.37) |

Note: HR, hazard ratio; CI, confidence interval; PYs, person-years. CMD include heart disease, stroke, and T2D. Multivariable models were adjusted for age, gender, marital status, education level, residence, smoking and alcohol consumption. *P* values<0.05 are bold.
